# 1 Photoreceptor inputs into pupil control

2

3 Manuel Spitschan<sup>1, 2, 3</sup>†, [\[0000-0002-8572-9268\]](https://orcid.org/0000-0002-8572-9268)

4

5 <sup>1</sup> *Department of Experimental Psychology, University of Oxford, Oxford, United Kingdom*

6

<sup>2</sup> *Centre for Chronobiology, Psychiatric Hospital of the University of Basel, Basel, Switzerland*

7

<sup>3</sup> *Transfaculty Research Platform Molecular and Cognitive Neurosciences, University of Basel, Basel, Switzerland*

8

9

10 † To whom correspondence should be addressed: Dr Manuel Spitschan, [manuel.spitschan@psy.ox.ac.uk](mailto:manuel.spitschan@psy.ox.ac.uk)

11

12

## 13 **Abstract**

14 The size of the pupil depends on light level. Watson & Yellott (2012) developed a  
15 unified formula to predict pupil size from luminance, field diameter, age, and number  
16 of eyes. Luminance reflects input from the L and M cones in the retina but ignores  
17 the contribution of intrinsically photosensitive retinal ganglion cells (ipRGCs)  
18 expressing the photopigment melanopsin, which are known to control the size of the  
19 pupil. We discuss the role of melanopsin in controlling pupil size by reanalysing an  
20 extant data set. We confirm that melanopsin-weighted quantities, in conjunction with  
21 Watson & Yellott's formula, adequately model intensity-dependent pupil size. We  
22 discuss the contributions of other photoreceptors into pupil control.

23 In a paper adequately described as a *tour de force*, Watson and Yellott [1] developed  
24 a unified formula to predict pupil size from luminance, field diameter, age, and  
25 number of eyes. This letter concerns the parametrisation of the retinal intensity,  
26 which in Watson and Yellott's model is given in terms of luminance, i.e. the radiance  
27 of the stimulus weighted by the photopic luminosity curve  $V(\lambda)$ .  $V(\lambda)$  corresponds to a  
28 mixture of the L and M cones in the retina, thereby largely ignoring the potential role  
29 of S cones, rods, and the intrinsically photosensitive retinal ganglion cells (ipRGCs)  
30 expressing the photopigment melanopsin [2-4].

31 The observation that  $V(\lambda)$ -weighted quantities do not predict pupil size is not new [5].  
32 In 1962, Bouma [6] noted that the spectral sensitivity of pupil control is neither  $V(\lambda)$   
33 nor the rod-based  $V'(\lambda)$ , interjecting that the outcome of his experiments "may turn  
34 out to be related to other adaptive processes in the human eye". Bouma himself  
35 modelled the spectral sensitivity as a combination of S cones and rods. We know  
36 now that steady-state pupil size is largely controlled by melanopsin.

37 To test if Bouma's data is consistent with melanopsin-based pupil control, we  
38 reanalysed the intensity-response curves from Bouma [6] as follows. We first  
39 extracted the data from Bouma's Figure 1 (Figure **1A, B**). For monochromatic lights,  
40 which we assumed Bouma used, it is simple to convert the reported  $V(\lambda)$ -weighted  
41 luminous flux into a melanopsin-weighted radiant flux [7]. As radiant flux describes  
42 the total amount of energy emitted by a source, it is not an appropriate measure to  
43 describe corneal or retinal intensity, so the absolute quantities are not informative  
44 unless a geometry is specified. Allowing for an arbitrary horizontal shift, Watson and  
45 Yellott's model accounts well for the shape of the pupil response as a function of  
46 melanopic radiant flux, except for long-wavelength lights (Fig. **1C**).

47 There is now a good body of evidence that all photoreceptors can control the  
48 diameter of the pupil. The best evidence comes from studies examining pupil size  
49 using the method of silent substitution, in which pairs of lights are alternated such  
50 that only one photoreceptor class is stimulated [8, 9]. Studies examining pupil control  
51 using this method are given in **Table 1**.

52 A key realisation is that while all photoreceptors may contribute to controlling the  
53 pupil size, the when and how is important. For example, due to rod saturation [10],  
54 rods are not expected to contribute to pupil control at photopic light levels. The  
55 temporal regimes in which the photoreceptors contribute are also different. Notably,

56 L+M stimulation is band-pass, while S cones and melanopsin are tuned to low  
57 frequencies in driving the pupil [11]. McDougal and Gamlin [12] found that cones and  
58 rods account for pupil constriction between 1 and 10 seconds from the onset of the  
59 light exposure, at 100 seconds, pupil size is largely controlled by melanopsin with  
60 some contribution from the rods.

61 To what extent does Watson and Yellott's use of luminance as an input parameter  
62 call into question the generalizability of their model? From first principles, differences  
63 between  $V(\lambda)$ -weighted and melanopic quantities are largest with monochromatic  
64 lights. But we typically do not live under monochromatic illumination. We explored  
65 this question by examining the range of melanopic irradiances at a fixed illuminance.  
66 In other words, how wrong would we be if we continued using  $V(\lambda)$ -weighted  
67 quantities to predict pupil size? Using a database of 401 polychromatic ("white")  
68 illuminant spectra [13], we calculated the range of melanopic irradiance while  
69 keeping the photopic illuminance fixed at 100 lux (Figure 2). Across all 401 spectra,  
70 a 100 lux light source has a melanopic irradiance of  $75.5 \pm 23.4$  mW/m<sup>2</sup>. The range of  
71 melanopic irradiances is between 20.4 and 164 melanopic mW/m<sup>2</sup>, i.e. in the worst  
72 case a factor of ~8. Whether or not this worst-case misprediction by using a  $V(\lambda)$ -  
73 weighted quantity has tangible consequences depends on the application. Predicting  
74 pupil size in a psychophysical experiment at mesopic light levels requires less  
75 stringent estimation of retinal intensity than safety-critical calculations.

76 A recent study reported attempted to derive a formula for predicting pupil size also  
77 from melanopsin activation but only focused on a rather narrow luminance range  
78 (50-300 cd/m<sup>2</sup>) [14]. While this is a good start, it might be a useful empirical exercise  
79 to collect natural pupil sizes under a large range of illumination conditions (indoors,  
80 outdoors) under natural behaviour with conjoint spectral measurements.

81 **Figures**

82  
83

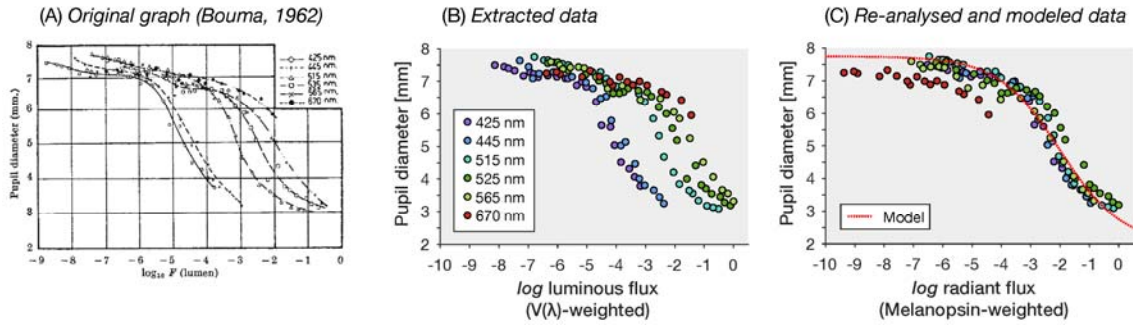

84  
85  
86  
87  
88  
89  
90  
91

**Figure 1.** **A** Original graph from Bouma [6] relating luminous flux to pupil diameter in millimeters. **B** Replotted extracted pupil size data (using WebPlotDigitizer, <https://automeris.io/WebPlotDigitizer/>). **C** Re-analysed (in terms of normalised melanopic radiant flux) and modelled pupil size data.

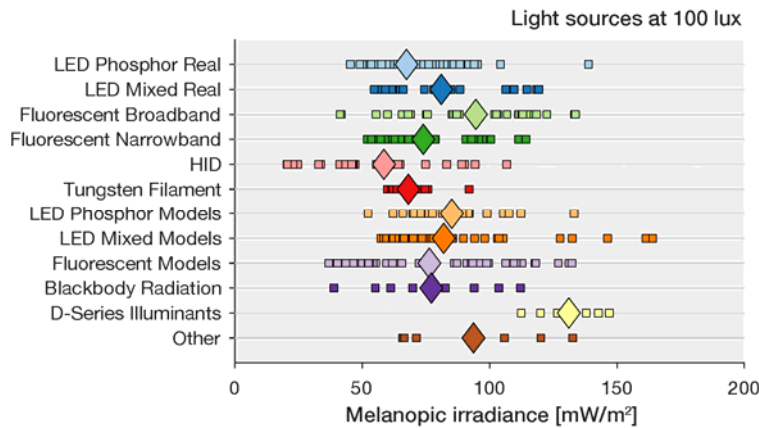

92  
93  
94  
95

**Figure 2.** Variability of the melanopic irradiance of 401 polychromatic “white” light sources [13] at 100 lux.

96 **Table 1: Evidence of photoreceptor contributions to pupil control**

97

| Photoreceptor class | Reference                                                                                                                                                                                                 |
|---------------------|-----------------------------------------------------------------------------------------------------------------------------------------------------------------------------------------------------------|
| Melanopsin          | Tsujimura, et al. [15]<br>Vienot, et al. [16]<br>Tsujimura and Tokuda [17]<br>Spitschan, et al. [11]<br>Cao, et al. [18]<br>Barrionuevo and Cao [19]<br>Spitschan, et al. [20]<br>Zelevansky, et al. [21] |
| L cone              | Spitschan, et al. [11] (L+M)<br>Spitschan, et al. [20] (L+M+S)<br>Barrionuevo and Cao [19]<br>Murray, et al. [22]<br>Woelders, et al. [23]                                                                |
| M cone              | Spitschan, et al. [11] (L+M)<br>Spitschan, et al. [20] (L+M+S)<br>Barrionuevo and Cao [19]<br>Murray, et al. [22]<br>Woelders, et al. [23]                                                                |
| S cone              | Spitschan, et al. [11]<br>Spitschan, et al. [20]<br>Barrionuevo and Cao [19]<br>Cao, et al. [18]<br>Murray, et al. [22]<br>Woelders, et al. [23]                                                          |
| Rods                | Barrionuevo, et al. [24]<br>Barrionuevo, et al. [25]                                                                                                                                                      |

98

99

## References

100  
101  
102  
103  
104  
105  
106  
107  
108  
109  
110  
111  
112  
113  
114  
115  
116  
117  
118  
119  
120  
121  
122  
123  
124  
125  
126  
127  
128  
129  
130  
131  
132

1. Watson, A.B., and Yellott, J.I. (2012). A unified formula for light-adapted pupil size. *J Vis* 12, 12.
2. Provencio, I., Rodriguez, I.R., Jiang, G., Hayes, W.P., Moreira, E.F., and Rollag, M.D. (2000). A novel human opsin in the inner retina. *J Neurosci* 20, 600-605.
3. Dacey, D.M., Liao, H.W., Peterson, B.B., Robinson, F.R., Smith, V.C., Pokorny, J., Yau, K.W., and Gamlin, P.D. (2005). Melanopsin-expressing ganglion cells in primate retina signal colour and irradiance and project to the LGN. *Nature* 433, 749-754.
4. Gamlin, P.D., McDougal, D.H., Pokorny, J., Smith, V.C., Yau, K.W., and Dacey, D.M. (2007). Human and macaque pupil responses driven by melanopsin-containing retinal ganglion cells. *Vision Res* 47, 946-954.
5. Berman, S.M., Jewett, D.L., Fein, G., Saika, G., and Ashford, F. (2016). Photopic luminance does not always predict perceived room brightness. *Lighting Research & Technology* 22, 37-41.
6. Bouma, H. (1962). Size of the Static Pupil as a Function of Wave-length and Luminosity of the Light Incident on the Human Eye. *Nature* 193, 690-691.
7. CIE (2018). CIE System for Metrology of Optical Radiation for ipRGC-influenced Responses To Light. (Vienna, Austria: CIE Central Bureau).
8. Spitschan, M., and Woelders, T. (2018). The Method of Silent Substitution for Examining Melanopsin Contributions to Pupil Control. *Front Neurol* 9, 941.
9. Estevez, O., and Spekreijse, H. (1982). The "silent substitution" method in visual research. *Vision Res* 22, 681-691.
10. Aguilar, M., and Stiles, W.S. (1954). Saturation of the Rod Mechanism of the Retina at High Levels of Stimulation. *Optica Acta* 1, 59-65.
11. Spitschan, M., Jain, S., Brainard, D.H., and Aguirre, G.K. (2014). Opponent melanopsin and S-cone signals in the human pupillary light response. *Proc Natl Acad Sci U S A* 111, 15568-15572.
12. McDougal, D.H., and Gamlin, P.D. (2010). The influence of intrinsically-photosensitive retinal ganglion cells on the spectral sensitivity and response dynamics of the human pupillary light reflex. *Vision Res* 50, 72-87.

- 133 13. Houser, K.W., Wei, M., David, A., Krames, M.R., and Shen, X.S. (2013).  
134 Review of measures for light-source color rendition and considerations for a  
135 two-measure system for characterizing color rendition. *Opt Express* 21,  
136 10393-10411.
- 137 14. Rao, F., Chan, A.H.S., and Zhu, X.F. (2017). Effects of photopic and circadian  
138 illumination on steady state pupil sizes. *Vision Res* 137, 24-28.
- 139 15. Tsujimura, S., Ukai, K., Ohama, D., Nuruki, A., and Yunokuchi, K. (2010).  
140 Contribution of human melanopsin retinal ganglion cells to steady-state pupil  
141 responses. *Proc Biol Sci* 277, 2485-2492.
- 142 16. Vienot, F., Bailacq, S., and Rohellec, J.L. (2010). The effect of controlled  
143 photopigment excitations on pupil aperture. *Ophthalmic Physiol Opt* 30, 484-  
144 491.
- 145 17. Tsujimura, S., and Tokuda, Y. (2011). Delayed response of human  
146 melanopsin retinal ganglion cells on the pupillary light reflex. *Ophthalmic*  
147 *Physiol Opt* 31, 469-479.
- 148 18. Cao, D., Nicandro, N., and Barrionuevo, P.A. (2015). A five-primary  
149 photostimulator suitable for studying intrinsically photosensitive retinal  
150 ganglion cell functions in humans. *J Vis* 15, 15 11 27.
- 151 19. Barrionuevo, P.A., and Cao, D. (2016). Luminance and chromatic signals  
152 interact differently with melanopsin activation to control the pupil light  
153 response. *J Vis* 16, 29.
- 154 20. Spitschan, M., Bock, A.S., Ryan, J., Frazzetta, G., Brainard, D.H., and  
155 Aguirre, G.K. (2017). The human visual cortex response to melanopsin-  
156 directed stimulation is accompanied by a distinct perceptual experience. *Proc*  
157 *Natl Acad Sci U S A* 114, 12291-12296.
- 158 21. Zele, A.J., Feigl, B., Adhikari, P., Maynard, M.L., and Cao, D. (2018).  
159 Melanopsin photoreception contributes to human visual detection, temporal  
160 and colour processing. *Sci Rep* 8, 3842.
- 161 22. Murray, I.J., Kremers, J., McKeefry, D., and Parry, N.R.A. (2018). Paradoxical  
162 pupil responses to isolated M-cone increments. *J Opt Soc Am A Opt Image*  
163 *Sci Vis* 35, B66-B71.
- 164 23. Woelders, T., Leenheers, T., Gordijn, M.C.M., Hut, R.A., Beersma, D.G.M.,  
165 and Wams, E.J. (2018). Melanopsin- and L-cone-induced pupil constriction is

166 inhibited by S- and M-cones in humans. *Proc Natl Acad Sci U S A* 115, 792-  
167 797.

168 24. Barrionuevo, P.A., McAnany, J.J., Zele, A.J., and Cao, D. (2018). Non-  
169 linearities in the Rod and Cone Photoreceptor Inputs to the Afferent Pupil  
170 Light Response. *Front Neurol* 9, 1140.

171 25. Barrionuevo, P.A., Nicandro, N., McAnany, J.J., Zele, A.J., Gamlin, P., and  
172 Cao, D. (2014). Assessing rod, cone, and melanopsin contributions to human  
173 pupil flicker responses. *Invest Ophthalmol Vis Sci* 55, 719-727.

174



(A) Original graph (Bouma, 1962)

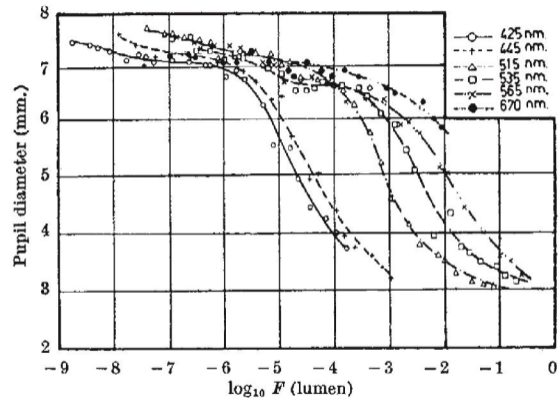

(B) Extracted data

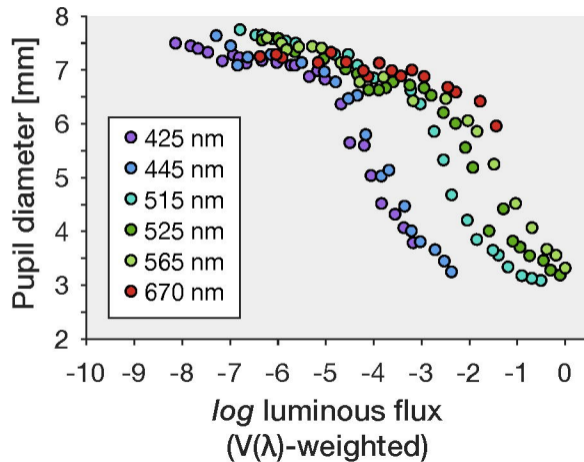

(C) Re-analysed and modeled data

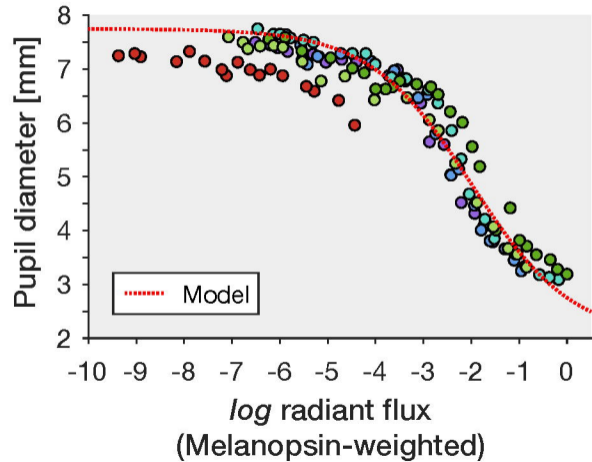

# Light sources at 100 lux

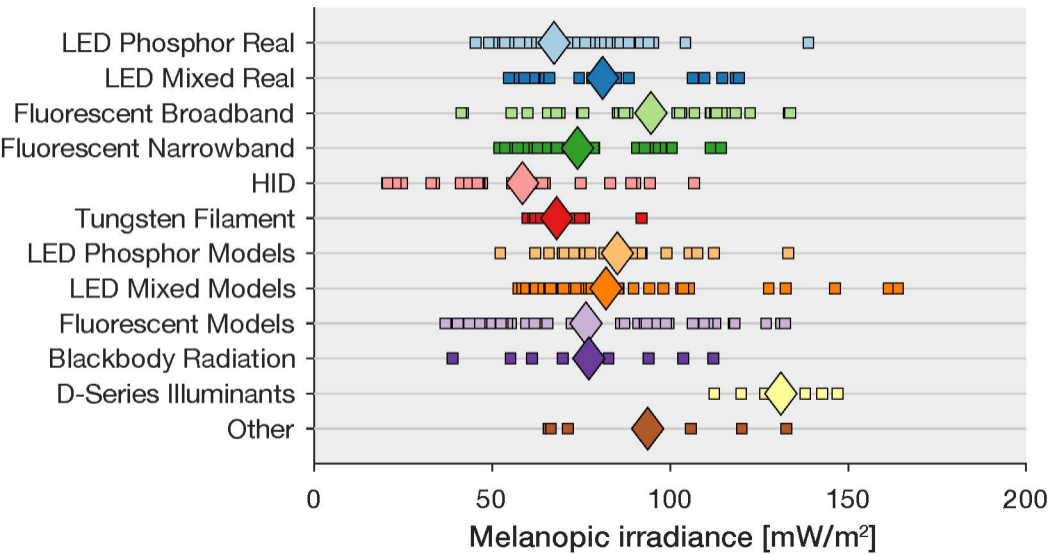

Source: https://www.biorxiv.org/content/10.1101/624759v1.full.pdf
